# Supplementary material for: Lignosulfonate-Based Conducting Flexible Polymeric Membranes for Liquid Sensing Applications
Source: MDPI journal article supplement (doi:10.3390/ma14185331), 2021-09-15
Supplement: s1 [file s1]

# Lignosulfonate-Based Conducting Flexible Polymeric Membranes for Liquid Sensing Applications

Sandra Magina <sup>1</sup>, Alisa Rudnitskaya <sup>2</sup>, Silvia Soreto <sup>3</sup>, Luís Cadillon Costa <sup>3</sup>, Ana Barros-Timmons <sup>1</sup> and Dmitry V. Evtuguin <sup>1,\*</sup>

<sup>1</sup> CICECO—Aveiro Institute of Materials and Department of Chemistry, University of Aveiro, Aveiro, 3810-193, Portugal; smagina@ua.pt (S.M.); anabarros@ua.pt (A.B.-T.)

<sup>2</sup> CESAM and Department of Chemistry, University of Aveiro, 3810-193 Aveiro, Portugal; alisa@ua.pt

<sup>3</sup> I3N and Department of Physics, University of Aveiro, 3810-193 Aveiro, Portugal; silvia.soreto@ua.pt (S.S.); kady@ua.pt (L.C.C.)

\* Correspondence: dmitrye@ua.pt

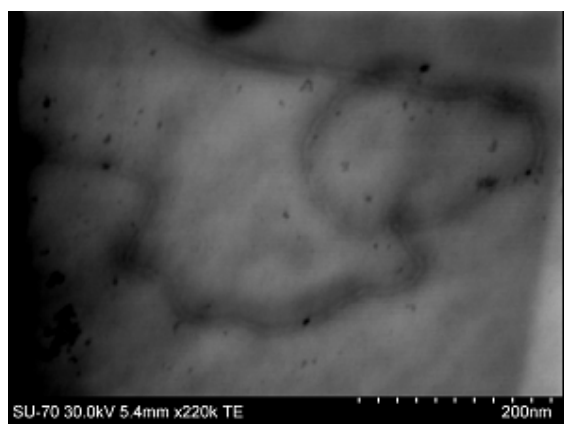

**Figure S1.** TEM image of the LS-based PU film doped with 1% w/w MWCNTs.

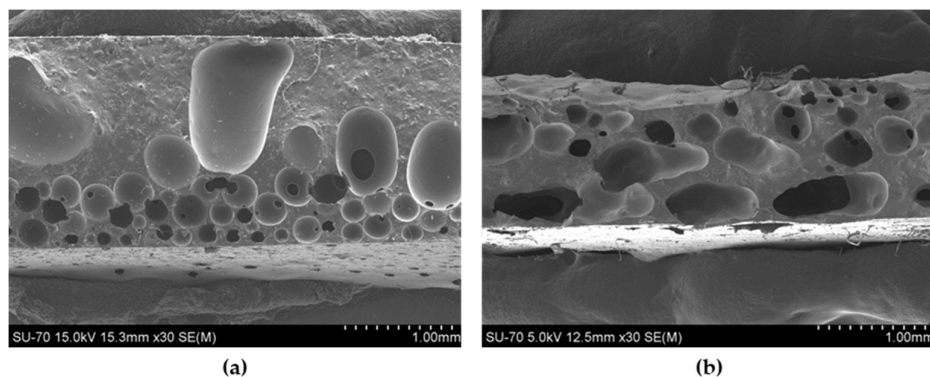

**Figure S2.** SEM images of the cross-section of LS-based PU films (a) undoped and (b) doped with 1% w/w of MWCNTs.

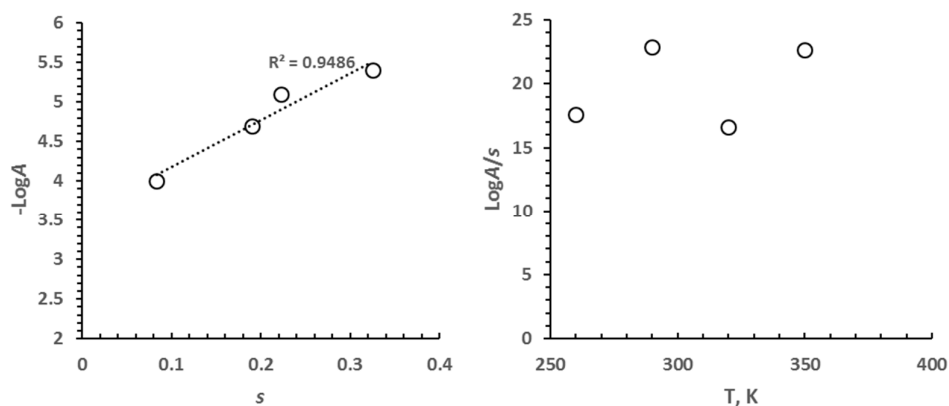

**Figure S3.**  $-\text{Log}A$  versus  $s$  and  $\text{Log}A/s$  versus  $T$  plots of LS-based PU film doped with 1% w/w of MWCNTs.

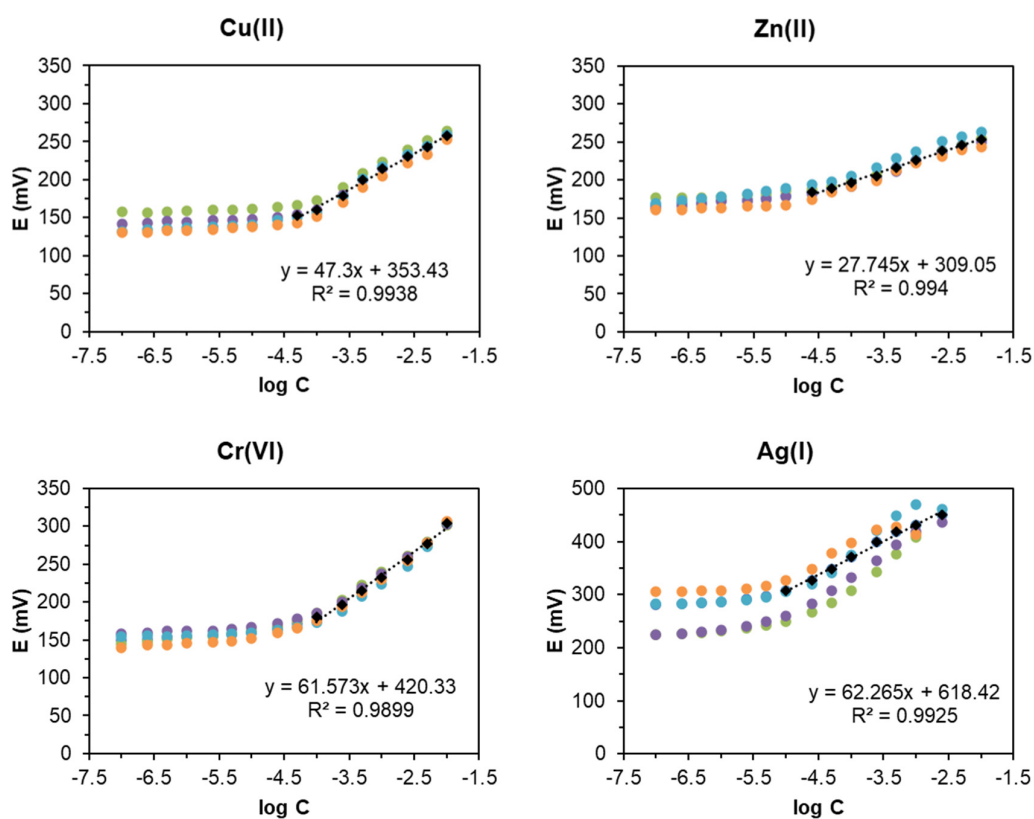

**Figure S4.** -Calibration curves LS-based PU composite membrane sensor doped with 1% w/w MWCNTs towards four selected cations (four calibration curves – coloured dots – for each cation and the re-spective average response slope with linear trendline – black).

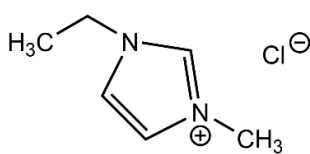

(a)

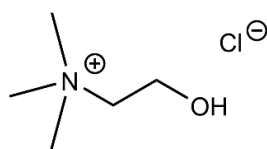

(b)

**Figure S5.** Chemical structure of the ILs studied: (a) 1-ethyl-3-methylimidazolium chloride and (b) choline chloride.

**Table S1.** Assignment of bands in FTIR-ATR spectra of purified LS from eucalypt thick sulphite pulping liquor and LS-based PU undoped (LS-PU) and doped with 1% w/w MWCNTs (LS-PU-CNT) [1,2,11,3–10].

| LS<br>(cm <sup>-1</sup> ) | LS-PU/ LS-PU-CNT<br>(cm <sup>-1</sup> ) | Assignment                                                                                                                                                                             |
|---------------------------|-----------------------------------------|----------------------------------------------------------------------------------------------------------------------------------------------------------------------------------------|
| 3356                      | 3298                                    | O-H stretching, H-bonded                                                                                                                                                               |
| 2940/2848                 | 2966/2916/<br>2860                      | C-H stretching in methyl, methylene and O-CH <sub>3</sub> groups                                                                                                                       |
| -                         | 1722                                    | C=O stretching (urethane group)                                                                                                                                                        |
| 1604                      |                                         | Aryl ring stretching, symmetric                                                                                                                                                        |
| -                         | 1530                                    | N-H bending (secondary amine in urethane group)                                                                                                                                        |
| 1510                      |                                         | Aryl ring stretching, asymmetric                                                                                                                                                       |
| 1460                      |                                         | C-H bending in O-CH <sub>3</sub> groups, asymmetric                                                                                                                                    |
| 1426                      |                                         | Aromatic skeletal vibration combined with C-H bending in O-CH <sub>3</sub> groups, asymmetric in-plane                                                                                 |
| 1330                      |                                         | C <sub>aryl</sub> -O vibrations, SO <sub>3</sub> H groups (S=O stretching vibration)                                                                                                   |
| -                         | 1220                                    | C-N stretching (urethane group)                                                                                                                                                        |
| 1210                      |                                         | C <sub>aryl</sub> -O vibrations, C-C, C-O, C=O stretching, metallic salt of SO <sub>3</sub> H groups (S=O stretching vibration)                                                        |
| 1154                      |                                         | Aromatic C-H in-plane deformation, SO <sub>3</sub> H groups                                                                                                                            |
| 1112                      |                                         | Aromatic C-H in-plane deformation, C-O-C groups, metallic salt of SO <sub>3</sub> H groups                                                                                             |
| -                         | 1086                                    | C-O-C vibration (polyether bridges)                                                                                                                                                    |
| 1034                      |                                         | Aromatic C-H in-plane deformation related with C-O, C-C stretching and C-OH stretching, SO <sub>3</sub> H groups, C <sub>alkyl</sub> -O ether vibrations (O-CH <sub>3</sub> and β-O-4) |
| 914/818                   |                                         | C-H deformation out-of-plane, aromatic ring                                                                                                                                            |
| 650/630                   |                                         | SO <sub>3</sub> H groups (S-O stretching vibration/C-S stretching vibration)                                                                                                           |
| 630                       |                                         | SO <sub>3</sub> H groups (C-S stretching vibration)                                                                                                                                    |

**Table S2.** Sensitivity characteristics of LS-based PU membrane sensor doped with 1% *w/w* MWCNTs at pH 7.

| Cation  | Slope (mV/decade) | Detection limit (M)    | Linear range (M)                               |
|---------|-------------------|------------------------|------------------------------------------------|
| Cu(II)  | 47.3 ± 2.1        | 4.6 × 10 <sup>-5</sup> | 5.0 × 10 <sup>-5</sup> –1 × 10 <sup>-2</sup>   |
| Cd(II)  | 20.3 ± 2.5        | 4.2 × 10 <sup>-6</sup> | 5.0 × 10 <sup>-6</sup> –1 × 10 <sup>-2</sup>   |
| Zn(II)  | 27.2 ± 0.7        | 1.2 × 10 <sup>-5</sup> | 1.5 × 10 <sup>-5</sup> –1 × 10 <sup>-2</sup>   |
| Hg(II)  | 40.9 ± 5.7        | 3.3 × 10 <sup>-5</sup> | 5.0 × 10 <sup>-5</sup> –1 × 10 <sup>-2</sup>   |
| Cr(VI)  | 61.6 ± 3.6        | 6.1 × 10 <sup>-5</sup> | 1.0 × 10 <sup>-4</sup> –1 × 10 <sup>-2</sup>   |
| Cr(III) | 68.3 ± 1.8        | 6.2 × 10 <sup>-5</sup> | 1.0 × 10 <sup>-4</sup> –1 × 10 <sup>-2</sup>   |
| Ag(I)   | 62.1 ± 15.5       | 4.9 × 10 <sup>-6</sup> | 1.0 × 10 <sup>-5</sup> –2.2 × 10 <sup>-3</sup> |

## References

1. Agarwal, U.P.; Atalla, R.H. Vibrational Spectroscopy. In *Lignin and lignans: advances in chemistry*; Heitner, C., Dimmel, D., Schmidt, J.A., Eds.; Taylor and Francis Group, LLC: Boca Raton, FL, 2010; pp. 103–136 ISBN 9781574444865.
2. Boeriu, C.G.; Bravo, D.; Gosselink, R.J.A.; van Dam, J.E.G. Characterisation of structure-dependent functional properties of lignin with infrared spectroscopy. *Ind. Crops Prod.* **2004**, *20*, 205–218, doi:10.1016/j.indcrop.2004.04.022.
3. Dawy, M.; Shabaka, A.A.; Nada, A.M.A. Molecular structure and dielectric properties of some treated lignins. *Polym. Degrad. Stab.* **1998**, *62*, 455–462, doi:10.1016/S0141-3910(98)00026-3.
4. Collier, W.; Kalasinsky, V.F.; Schultz, T.P. Infrared study of lignin: Assignment of methoxyl C-H bending and stretching bands. *Holzforschung* **1997**, *51*, 167–168, doi:10.1515/hfsg.1997.51.2.167.
5. Bellamy, L.J. *The Infrared Spectra of Complex Molecules. Volume 2. Advances in Infrared group frequencies*; 2nd Ed.; Chapman and Hall: London and New York, 1980; ISBN 978-94-011-6522-8.
6. Collier, W.E.; Schultz, T.P.; Kalasinsky, V.F. Infrared study of lignin: reexamination of acryl-alkyl ether C-O stretching. *Holzforschung* **1992**, *46*, 523–528.
7. Detoni, S.; Hadzi, D. Infra-red spectra of some organic sulphur-oxygen compounds. *Spectrochim. Acta* **1956**, *11*, 601–608, doi:10.1016/S0371-1951(56)80102-1.
8. Marques, A.P.; Evtuguin, D. V.; Magina, S.; Amado, F.M.L.; Prates, A. Chemical Composition of Spent Liquors from Acidic Magnesium-Based Sulphite Pulping of Eucalyptus globulus. *J. Wood Chem. Technol.* **2009**, *29*, 322–336, doi:10.1080/02773810903207754.
9. Hergert, H.L. Infrared spectra. In *Lignins: Occurrence, formation, structure and reactions*; Sarkanen, K. V., Ludwig, C.H., Eds.; John Wiley & Sons, Inc.: New York, 1971; pp. 267–297.
10. Faria, F.A.C.; Evtuguin, D. V.; Rudnitskaya, A.; Gomes, M.T.S.R.; Oliveira, J.A.B.P.; Graça, M.P.F.; Costa, L.C. Lignin-based polyurethane doped with carbon nanotubes for sensor applications. *Polym. Int.* **2012**, *61*, 788–794, doi:10.1002/pi.4140.
11. Zou, J.; Chen, Y.; Liang, M.; Zou, H. Effect of hard segments on the thermal and mechanical properties of water blown semi-rigid polyurethane foams. *J. Polym. Res.* **2015**, *22*, doi:10.1007/s10965-015-0770-y.
